# Supplementary material for: Contractile forces at tricellular contacts modulate epithelial organization and monolayer integrity
Source: PubMed Central journal article supplement (PMC5241865; doi:10.1038/ncomms13998), 2017-01-13
Supplement: ncomms13998-s1.pdf [file ncomms13998-s1.pdf]

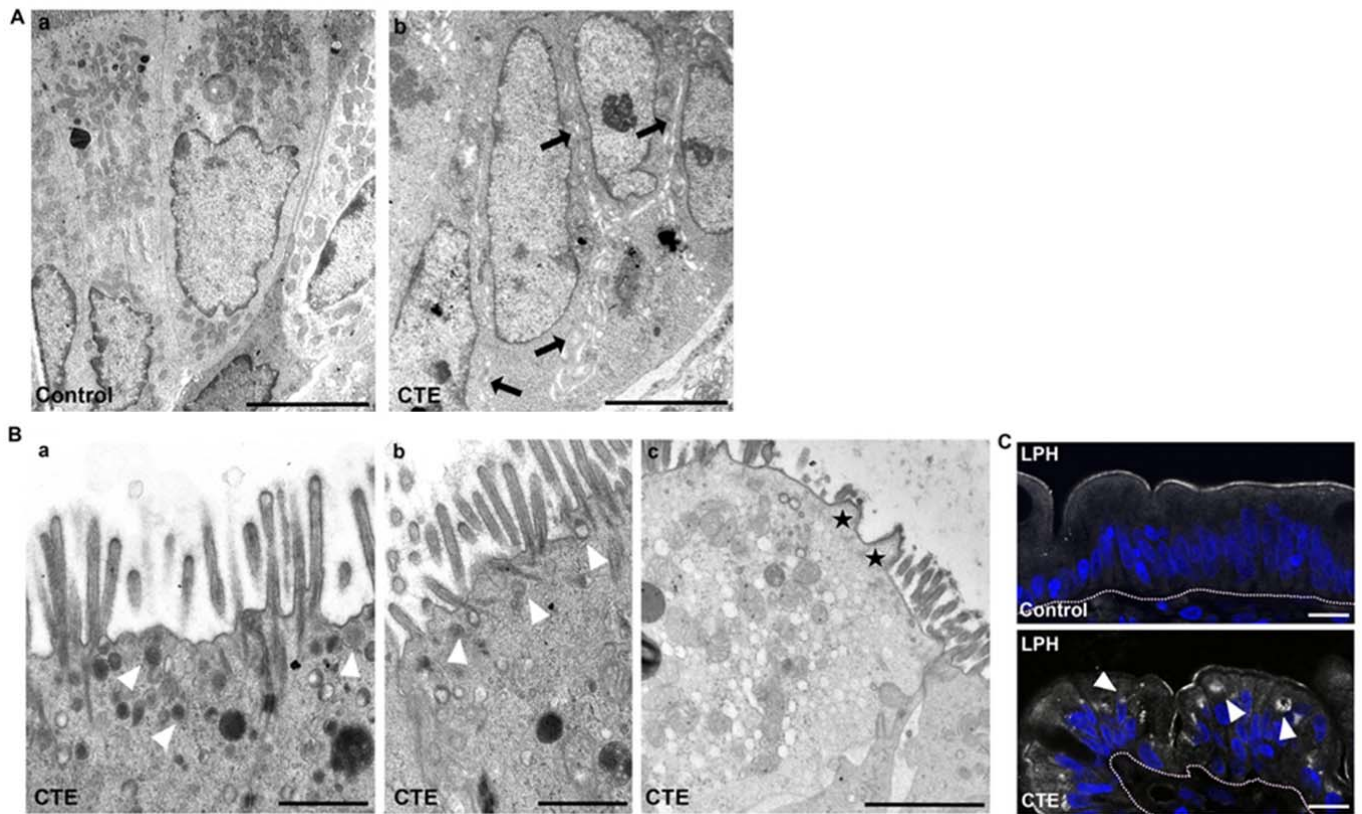

**Supplementary Figure 1: Cell-cell adhesion and terminal web defects occur in CTE patients.** (A), TEM ultrastructural analysis of lateral membranes in control (*a*) and CTE (*b*) biopsies. Arrows point at interdigitations on lateral membranes.  $N_{\text{(Control)}} = 3$  biopsies,  $N_{\text{(CTE)}} = 3$  biopsies. Scale bars, 5  $\mu\text{m}$ . (B), TEM ultrastructural analysis of enterocyte apical cortex in CTE biopsies. **Ba-b**, White arrowheads point at abnormal accumulation of electron dense vacuoles in the terminal web in CTE samples. **Bc**, Black stars show plasma membrane herniations.  $N_{\text{(Control)}} = 3$  biopsies,  $N_{\text{(CTE)}} = 3$  biopsies. Scale bars **Ba-b**, 1  $\mu\text{m}$ ; scale bar **Bc**, 2  $\mu\text{m}$ . (C), Confocal microscopy analyses of LPH distribution after immunostaining on control (*upper panel*) or CTE (*lower panel*) biopsy paraffin sections. In CTE epithelia, LPH was accumulated in perinuclear compartments (*white arrowheads*).  $N_{\text{(Control)}} = 12$  biopsies,  $N_{\text{(CTE)}} = 6$  biopsies. Scale bars, 10  $\mu\text{m}$ .

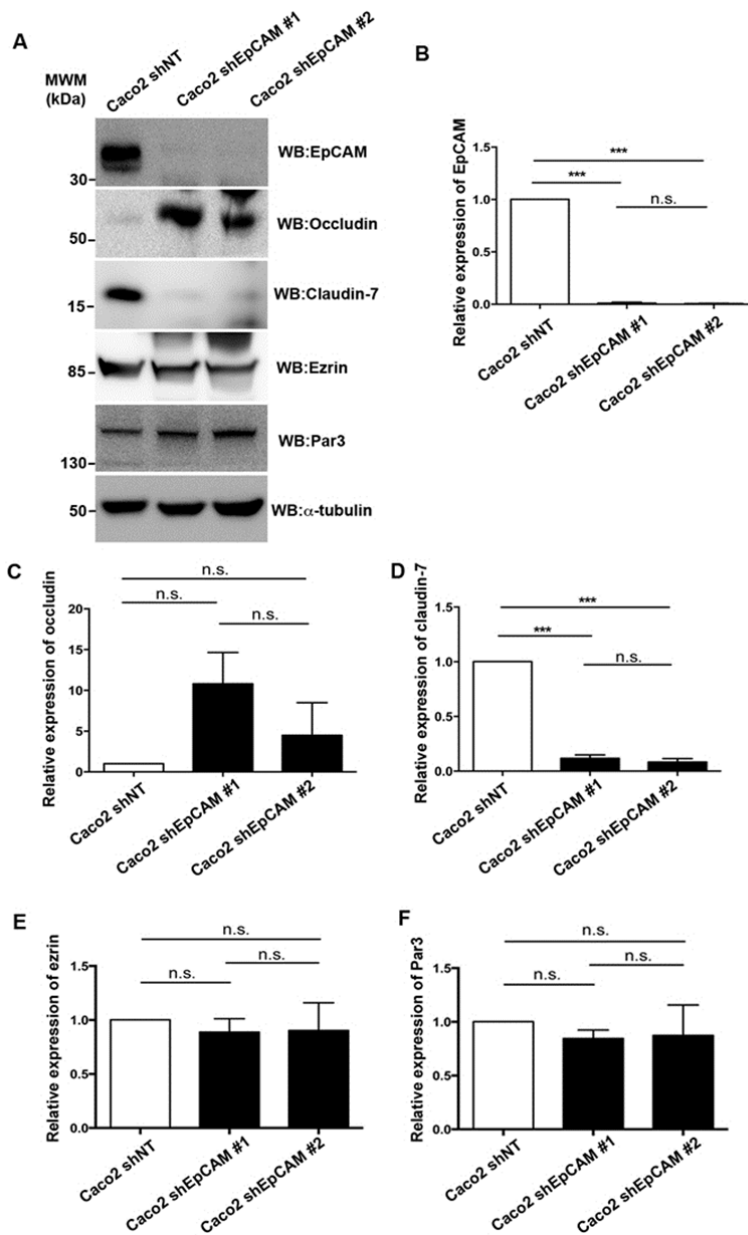

**Supplementary Figure 2: Expression levels in EpCAM-depleted cells.** (A) Western blot analysis of the level of the expression of EpCAM, occludin, claudin-7, ezrin and Par3 in control (*Caco2 shNT*) or EpCAM-depleted (*Caco2 shEpCAM#1* and *Caco2 shEpCAM#2*) clones.  $\alpha$ -tubulin was used as loading control. (B-F) Statistical analysis of EpCAM, occludin, claudin-7, ezrin or Par3 amounts relative to loading control amounts in control (*Caco2 shNT*) or EpCAM-depleted (*Caco2 shEpCAM #1* and *Caco2 shEpCAM #2*) clones. The analysis was performed based on three independent experiments. Statistical significance was determined using one-way ANOVA and Tukey's multiple comparison tests. \*\*\*,  $P$ -value < 0.0001. Percentage of EpCAM expression in control cells = 100 %, in *Caco2 shEpCAM#1* cells =  $1.08 \pm 0.0009$  %, and in *Caco2 shEpCAM#2* =  $0.72 \pm 0.003$  %. Percentage of occludin expression in control cells = 100 %, in *Caco2 sh EpCAM #1* cells =  $1081 \pm 383$  %, and in *Caco2 sh EpCAM #2* =  $449.1 \pm 399$  %. Percentage of claudin-7 expression in control cells = 100 %, in *Caco2 sh EpCAM #1* cells =  $11.71 \pm 0.03$  %, and in *Caco2 sh EpCAM #2* =  $8.34 \pm 0.03$  %. Percentage of ezrin expression in control cells = 100 %, in *Caco2 sh EpCAM #1* cells =  $88.75 \pm 0.12$  %, and in *Caco2 sh EpCAM #2* =  $90.31 \pm 0.26$  %. Percentage of Par3 expression in control cells = 100 %, in *Caco2 sh EpCAM #1* cells =  $84.62 \pm 0.08$  %, and in *Caco2 sh EpCAM #2* =  $87.43 \pm 0.28$  %. Values are mean  $\pm$  s.e.m.

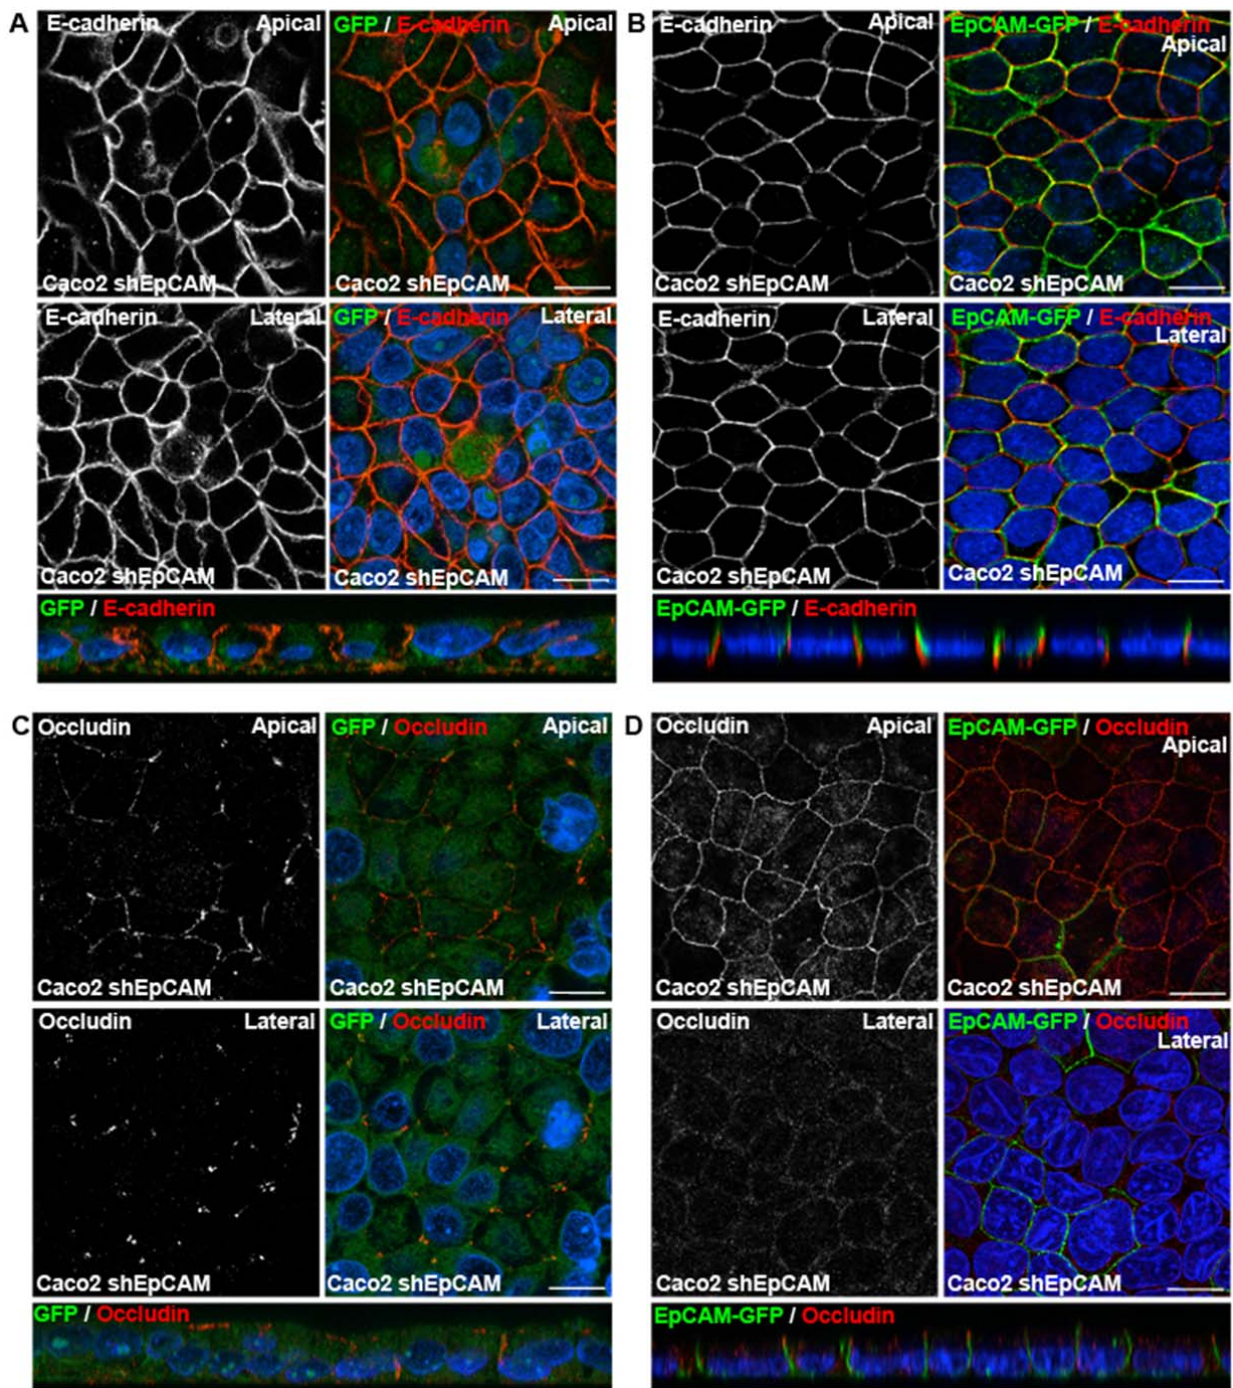

**Supplementary Figure 3: Recovering of cell-cell adhesion integrity and tight junction belt positioning after EpCAM rescue in EpCAM-mutant cells.** Confocal microscopy analysis of immunostainings for E-cadherin (*red*) (**A-B**) and occludin (*red*) (**C-D**), on the apical (*Apical*) and lateral (*Lateral*) sides in EpCAM-depleted cells transfected with plasmids coding for GFP (**A** and **C**) or shRNA resistant EpCAM-GFP (**B** and **D**) constructs. *xy* and *xz* views are presented. Scale bars, 5  $\mu$ m. Nuclei were detected with Hoechst 33342 staining (*blue*).

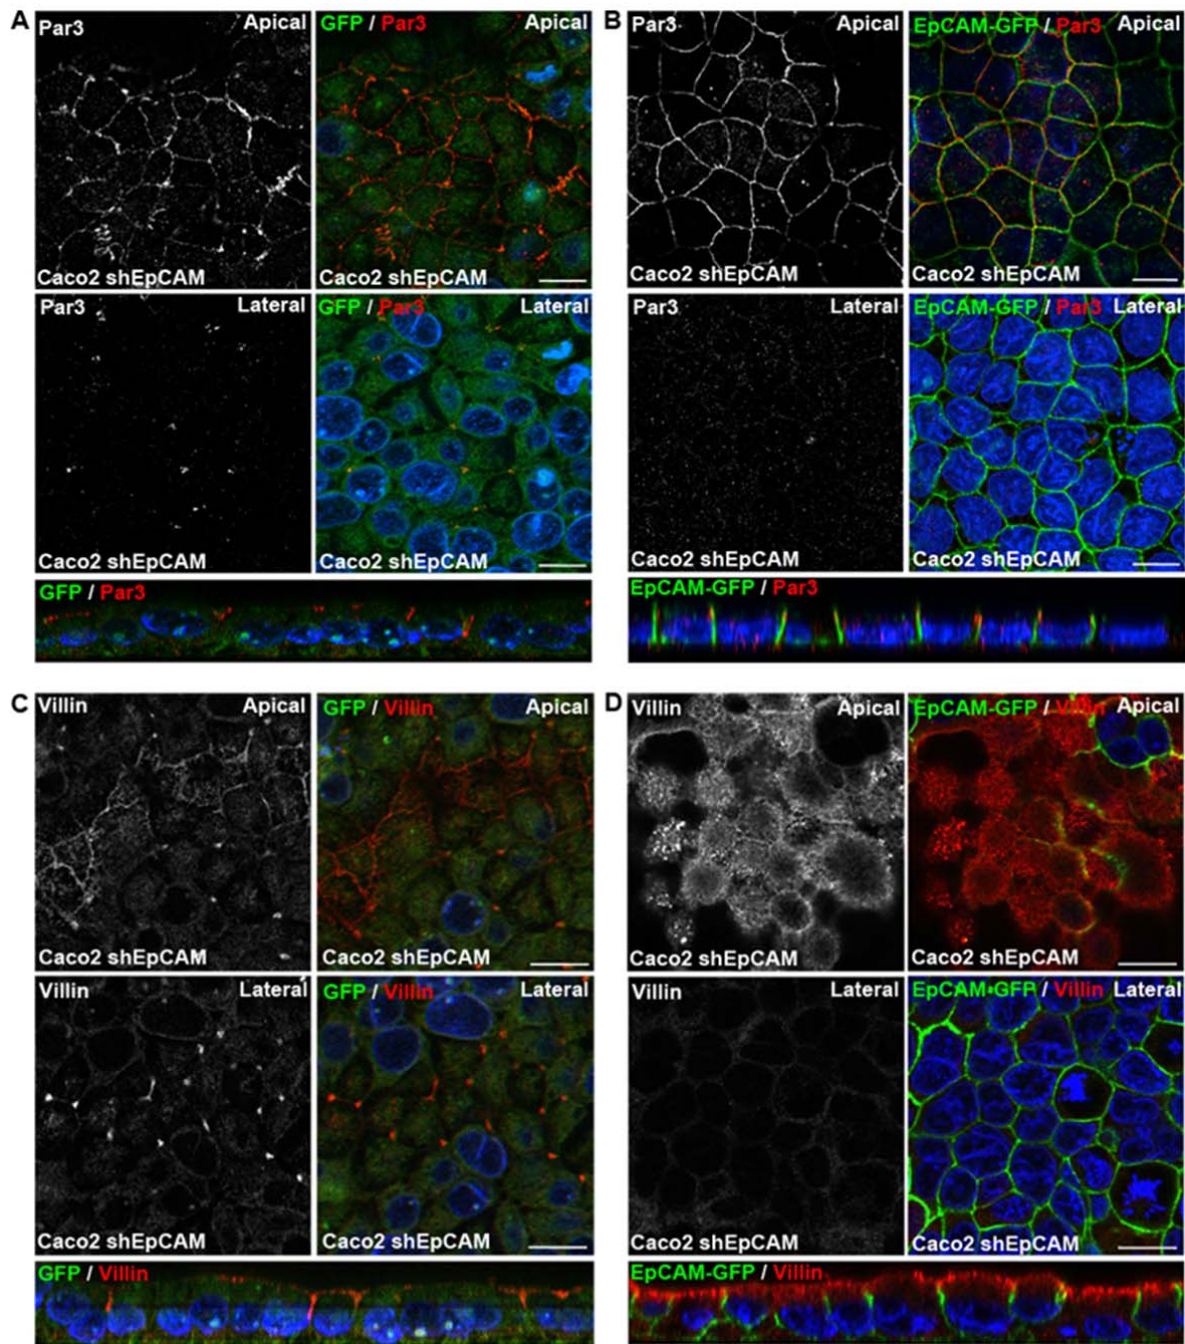

**Supplementary Figure 4: Recovering of correct apical domain positioning after EpCAM rescue in EpCAM-mutant cells.** Confocal microscopy analysis of immunostainings for Par3 (red) (A-B) and villin (red) (C-D), on the apical (*Apical*) and lateral (*Lateral*) sides in EpCAM-depleted cells transfected with plasmids coding for GFP (A and C) or shRNA resistant EpCAM-GFP (B and D) constructs. *xy* and *xz* views are presented. Scale bars, 5  $\mu$ m. Nuclei were detected with Hoechst 33342 staining (blue).

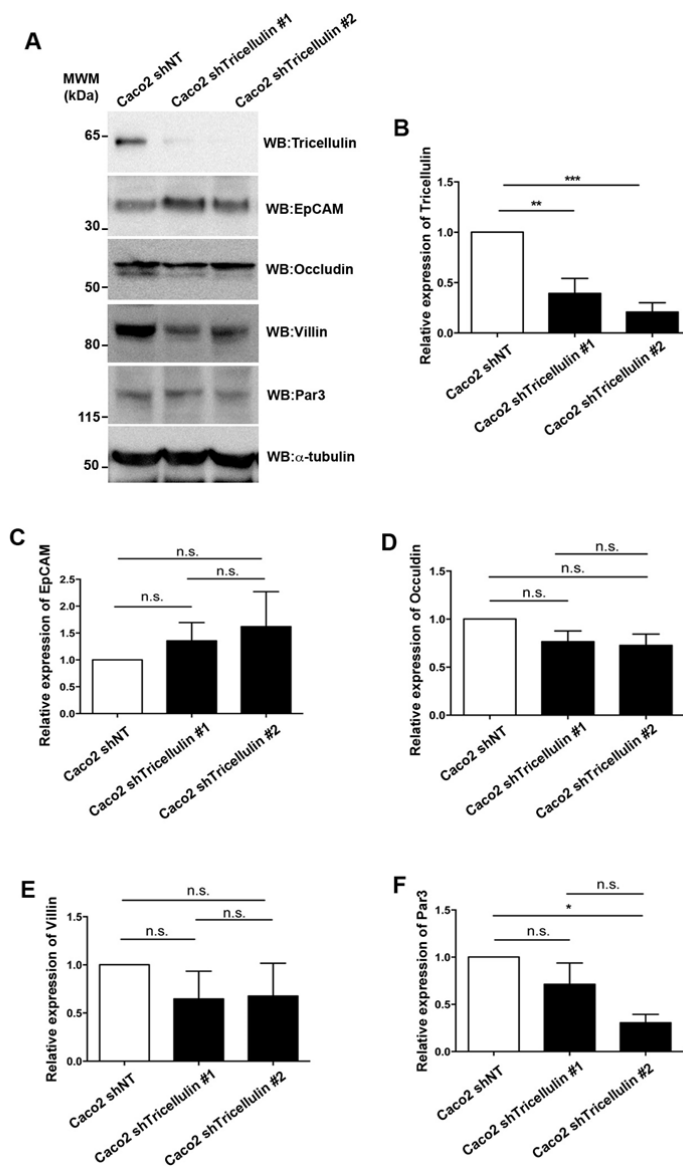

**Supplementary Figure 5: Expression levels in tricellulin-depleted cells.** (A) Western blot analysis of the level of the expression of tricellulin, EpCAM, occludin, villin and Par3 in control (*Caco2 shNT*) or tricellulin-depleted (*Caco2 shTricellulin #1* and *Caco2 shTricellulin #2*) clones.  $\alpha$ -tubulin was used as loading control. (B-F) Statistical analysis of tricellulin, EpCAM, occludin, villin or Par3 amounts relative to  $\alpha$ -tubulin amounts in control (*Caco2 shNT*) or tricellulin-depleted (*Caco2 shTricellulin #1* and *Caco2 shTricellulin #2*) clones. The analysis was performed based on three independent experiments. Statistical significance was determined using one-way ANOVA and Tukey's multiple comparison tests. \*, *P*-value < 0.1, \*\*, *P*-value < 0.01, \*\*\*, *P*-value < 0.001. Percentage of tricellulin expression in Caco2shNT cells = 100 %, in Caco2 shTricellulin#1 cells = 39.28  $\pm$ 0.15 %, and in Caco2 shTricellulin#2 = 20.79  $\pm$ 0.09 %. Percentage of EpCAM expression in Caco2shNT cells = 100 %, in Caco2 shTricellulin#1 cells = 135  $\pm$ 0.34 %, and in Caco2 shTricellulin#2 = 162  $\pm$ 0.65 %. Percentage of occludin expression in Caco2shNT cells = 100 %, in Caco2 shTricellulin#1 cells = 76.56  $\pm$ 0.11 %, and in Caco2 shTricellulin#2 = 72.65  $\pm$ 0.12 %. Percentage of villin expression in Caco2shNT cells = 100 %, in Caco2 shTricellulin#1 cells = 64.69  $\pm$ 0.29 %, and in Caco2 shTricellulin#2 = 67.64  $\pm$ 0.34 %. Percentage of Par3 expression in Caco2shNT cells = 100 %, in Caco2 shTricellulin#1 cells = 71.26  $\pm$ 0.23 %, and in Caco2 shTricellulin#2 = 30.51  $\pm$ 0.09 %. Values are mean $\pm$ s.e.m.

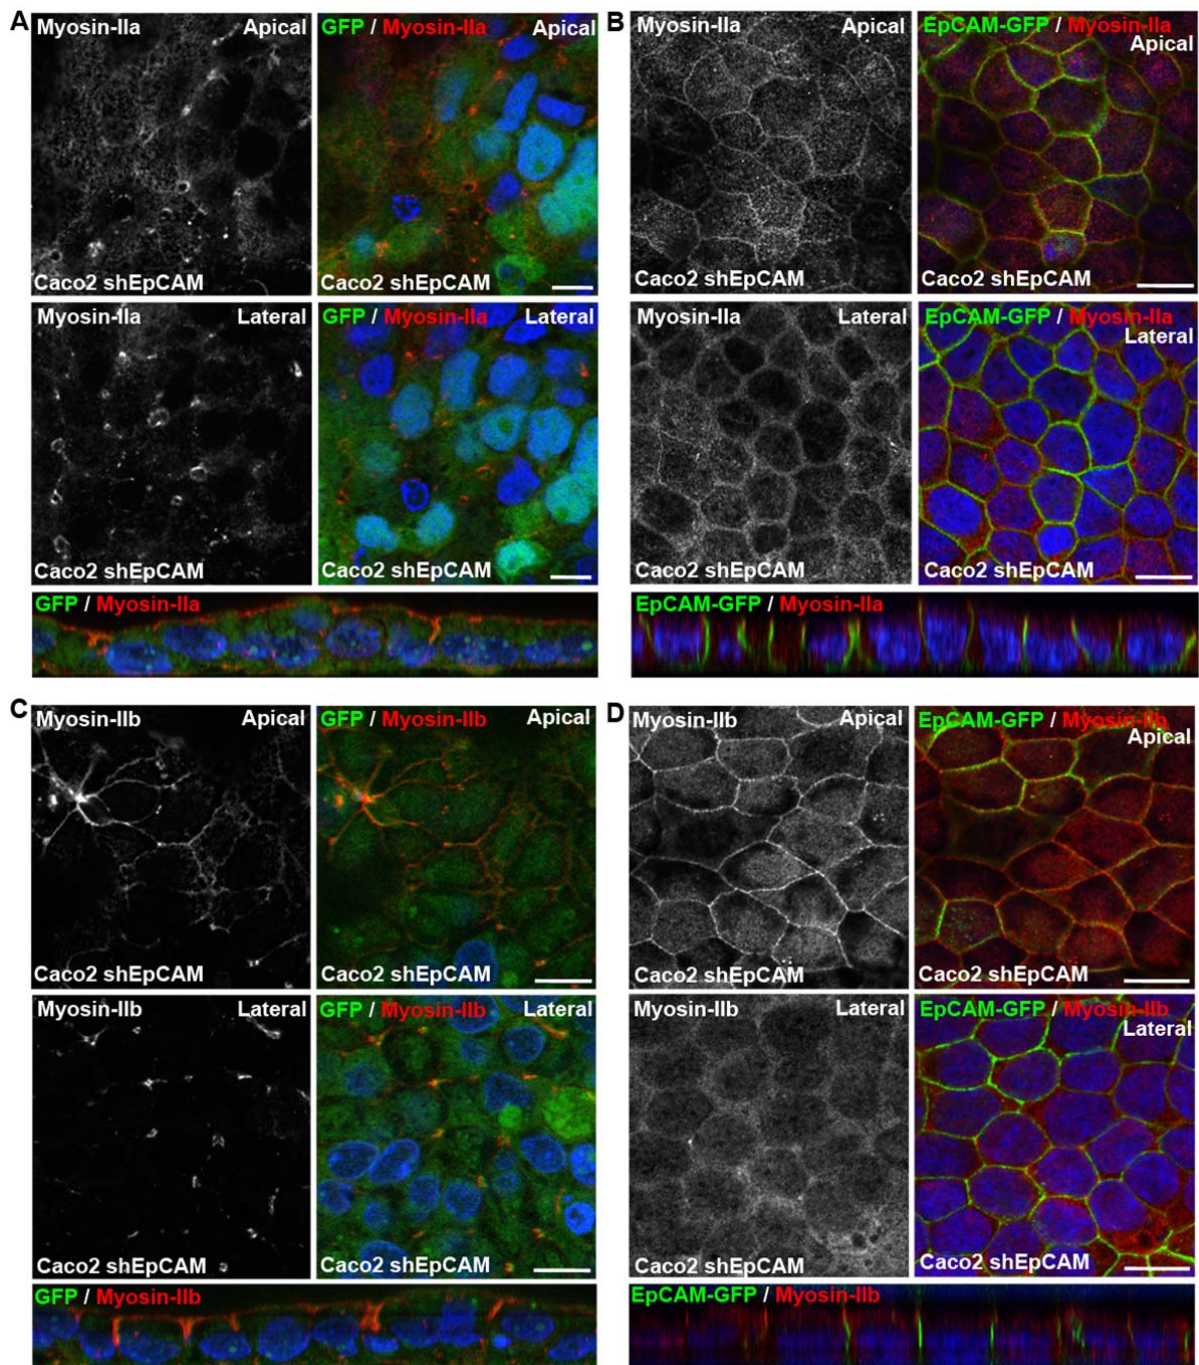

**Supplementary Figure 6: Recovering of correct actomyosin positioning after EpCAM rescue in EpCAM-mutant cells.** Confocal microscopy analysis of immunostainings for myosin-IIa (*red*) (A-B) and myosin-IIb (*red*) (C-D), on the apical (*Apical*) and lateral (*Lateral*) sides in EpCAM-depleted cells transfected with plasmids coding for GFP (A and C) or shRNA resistant EpCAM-GFP (B and D) constructs. *xy* and *xz* views are presented. Scale bars, 5  $\mu$ m. Nuclei were detected with Hoechst 33342 staining (*blue*).

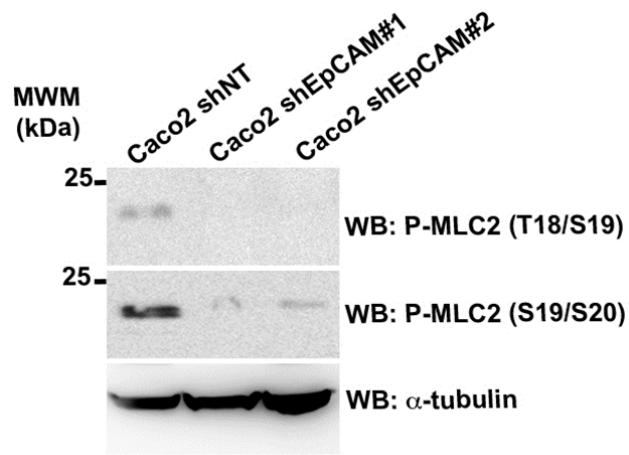

**Supplementary Figure 7: P-MLC2 amounts are decreased in EpCAM-mutant cells** Western blot analysis of P-MLC2 amounts in control (*Caco2 shNT*) or EpCAM-depleted (*Caco2 shEpCAM#1* and *Caco2 shEpCAM#2*) cells, using antibodies directed against either P-MLC2 (T18/S19) or P-MLC2 (S19/S20).  $\alpha$ -tubulin was used as loading control.

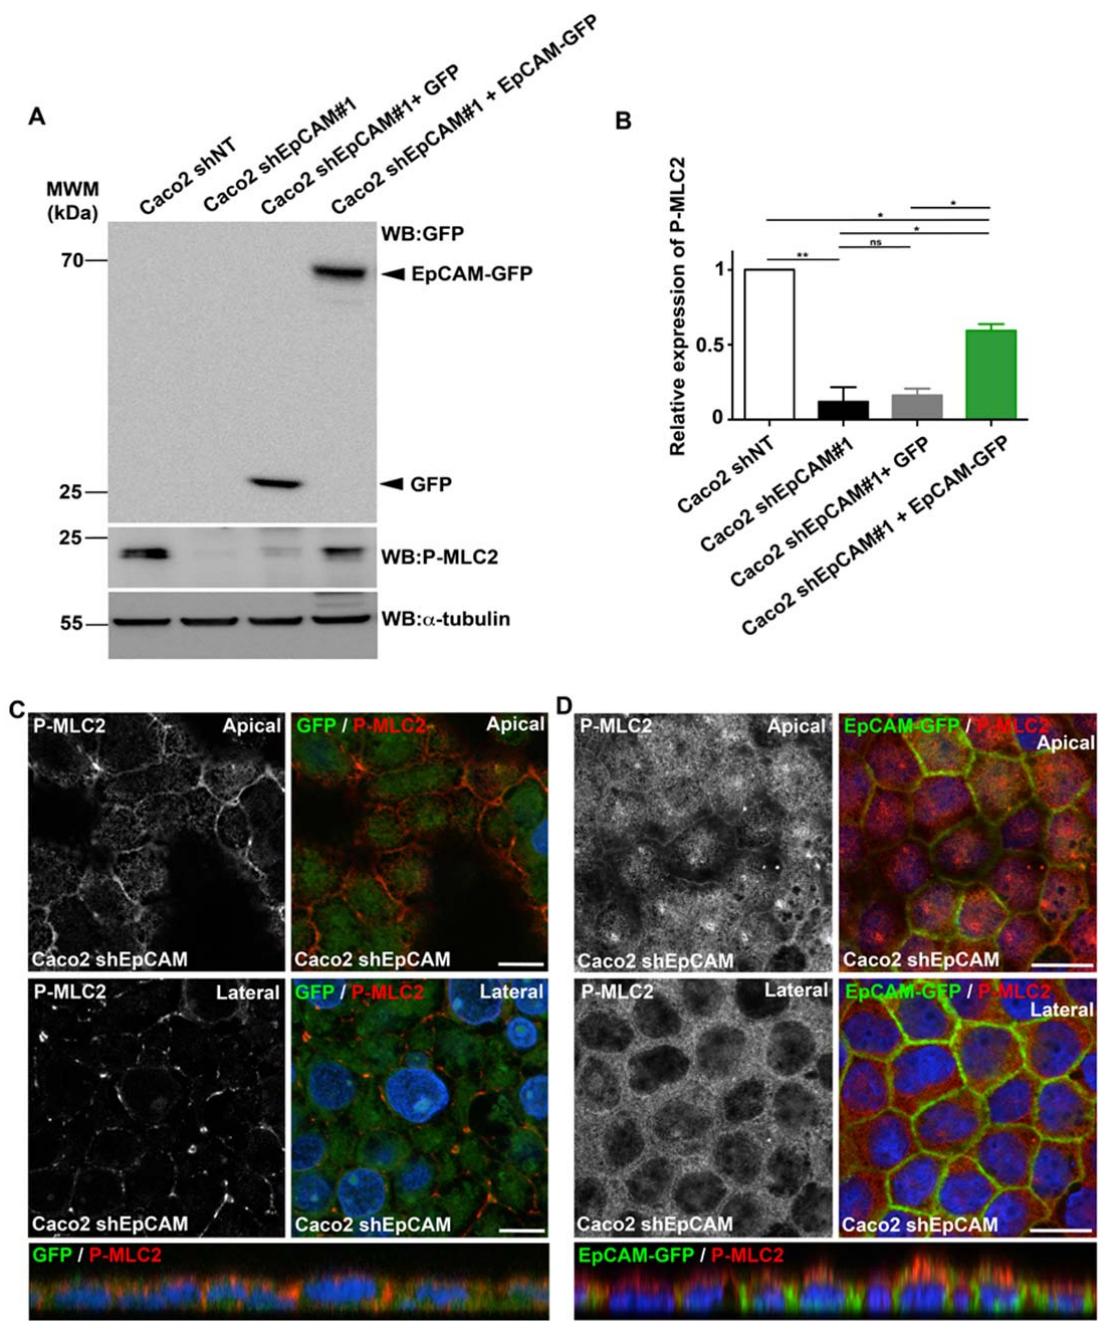

**Supplementary Figure 8: Restoration of proper P-MLC2 amounts and distribution after EpCAM rescue in EpCAM-mutant cells.** (A) Western blot analysis of P-MLC2 amounts in control (*Caco2 shNT*) or EpCAM-depleted (*Caco2 shEpCAM#1*) cells, transfected either with GFP (*Caco2 shEpCAM#1+GFP*) or EpCAM-GFP (*Caco2 shEpCAM#1+EpCAM-GFP*) constructs. (B) Statistical significance was determined using one-way ANOVA and Tukey's multiple comparison tests. The analysis was performed based on three independent experiments. \*, *P*-value < 0.1, \*\*, *P*-value < 0.01. Percentage of P-MLC2 expression in *Caco2shNT* cells = 100 %, in *Caco2 shEpCAM#1* cells = 11.89 ± 9.74 %, in *Caco2 shEpCAM#1+GFP* = 16.21 ± 4.45 % and in *Caco2 shEpCAM#1+EpCAM-GFP* = 59.5 ± 4.34 %. Values are mean ± s.e.m. (C-D) Confocal microscopy analysis of immunostainings for P-MLC2 (red) on the apical (Apical) and lateral (Lateral) sides in EpCAM-depleted cells transfected with plasmids coding for GFP (C) or shRNA resistant EpCAM-GFP (D) constructs. *xy* and *xz* views are presented. Scale bars, 5 μm. Nuclei were detected with Hoechst 33342 staining (blue).



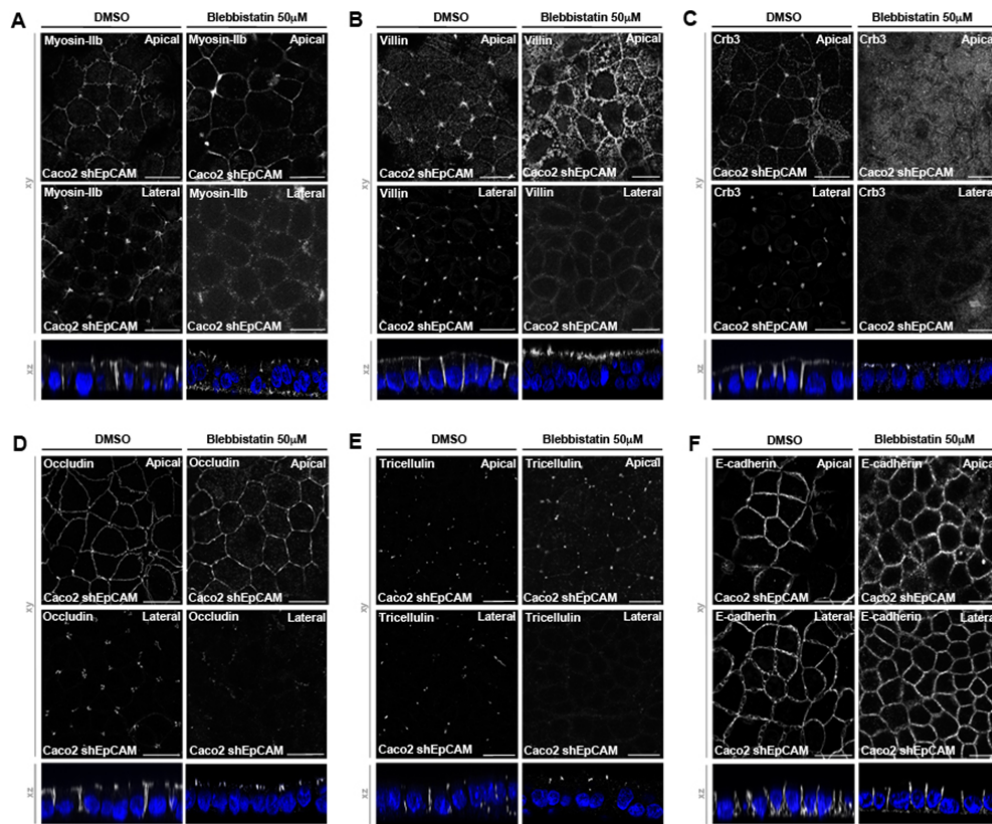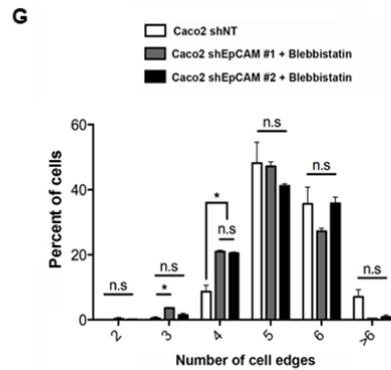

**Supplementary Figure 9: Recovery of correct epithelial organization upon blebbistatin treatment.** (A-F) Confocal microscopy analysis of myosin-IIb (A), villin (B), Crb3 (C), occludin (D), tricellulin (E) and E-cadherin (F) localization in Caco2 shEpCAM cells without or with 50  $\mu$ M blebbistatin treatment for 2 h. Scale bars, 5  $\mu$ m. (G) Statistical analysis of polygonal shape in control (*Caco2 shNT*, white) and 2h 50  $\mu$ M blebbistatin-treated EpCAM-deprived cells (*Caco2 shEpCAM#1 + blebbistatin*, gray, and *Caco2 shEpCAM#2 + blebbistatin*, black). Three independent experiments were performed.  $N$  (*Caco2shNT*) = 517 cells,  $N$  (*Caco2shEpCAM#1+blebbistatin*) = 732 and  $N$  (*Caco2shEpCAM#2+blebbistatin*) = 688. Percentage of Caco2 shNT cells with 2 cell edges = 0 %, with 3 cell edges =  $0,455 \pm 0,455$  %, with 4 cell edges =  $8,673 \pm 1,967$  %, with 5 cell edges =  $48,154 \pm 6,422$  %, with 6 cell edges =  $35,652 \pm 5,131$  %, with more than 6 cell edges =  $7,067 \pm 2,224$  %. Percentage of Caco2 shEpCAM#1 cells with 2 cell edges =  $0,391 \pm 0,391$  %, with 3 cell edges =  $3,697 \pm 0,129$  %, with 4 cell edges =  $21,010 \pm 0,419$  %, with 5 cell edges =  $47,228 \pm 1,419$  %, with 6 cell edges =  $27,263 \pm 0,913$  %, with more than 6 cell edges =  $0,411 \pm 0,014$  %. Percentage of Caco2 shEpCAM#2 cells with 2 cell edges =  $0,149 \pm 0,149$  %, with 3 cell edges =  $1,480 \pm 0,547$  %, with 4 cell edges =  $20,509 \pm 0,313$  %, with 5 cell edges =  $41,156 \pm 0,648$  %, with 6 cell edges =  $35,811 \pm 1,889$  %, with more than 6 cell edges =  $0,896 \pm 0,518$  %. Unpaired  $t$  tests, \*  $P$ -value  $< 0,01$ . Values are mean  $\pm$  s.e.m.

Hanging drop cultures

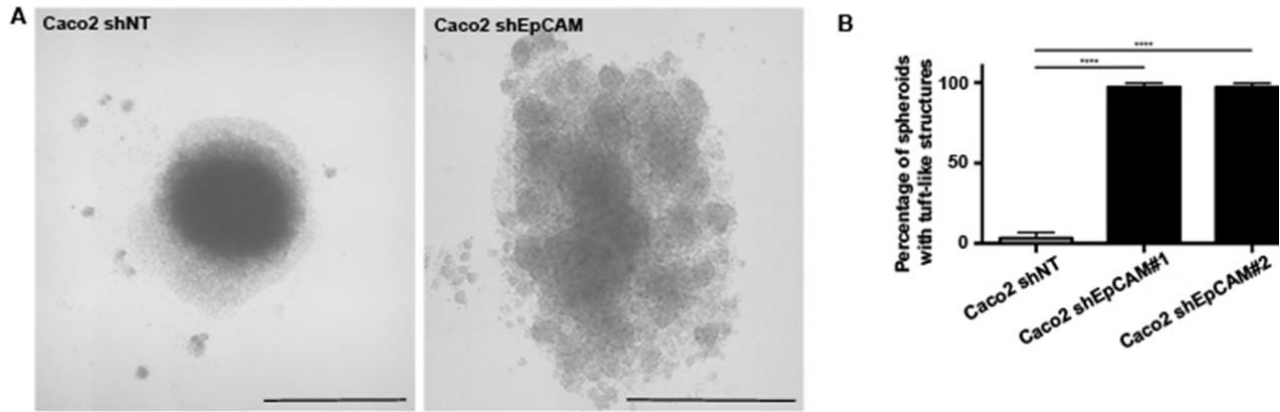

**Supplementary Figure 10: Spheroid organization defects in hanging drop cultures of EpCAM-depleted cells.** (A) Analyses of control (*Caco2 shNT*) or EpCAM-depleted (*Caco2 shEpCAM*) cells in hanging drop cultures for 48 hours. Scale bars, 1mm. (B) Statistical significance was determined using one-way ANOVA and Tukey's multiple comparison test. \*\*\*\*,  $P$ -value < 0.0001. Percentage of spheroids with tuft-like structures in Caco2shNT cells =  $3.2 \pm 2.1$  %, in Caco2 shEpCAM#1 cells =  $97.2 \pm 1.5$  %, and in Caco2 shEpCAM#2 =  $97.1 \pm 1.4$  %. Values are mean $\pm$ s.e.m.

Figure 2A

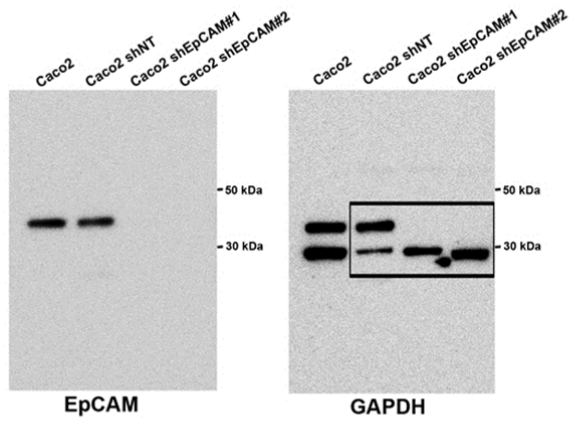

Figure 4E

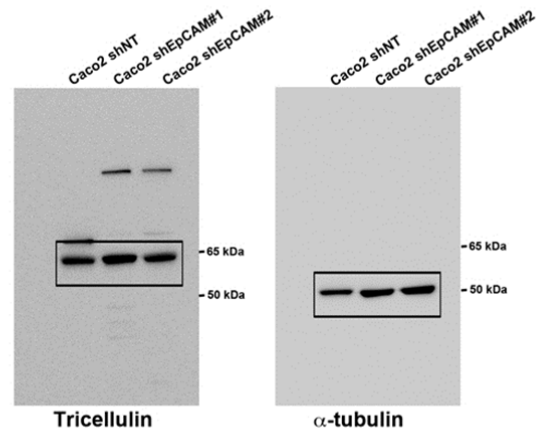

Figure 4G

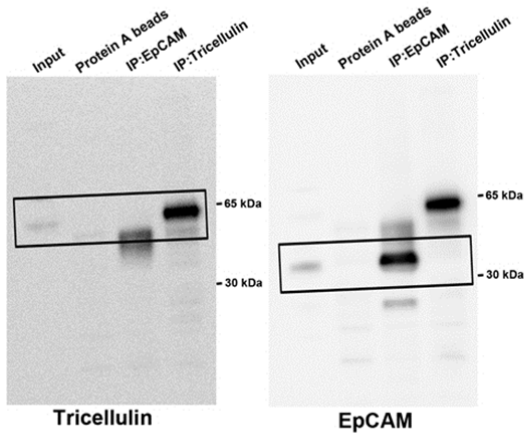

Figure 5G

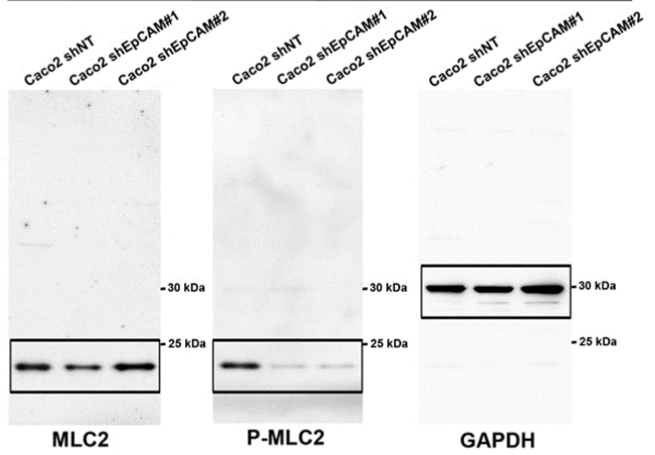

**Supplementary Figure 11:** Uncropped original gels shown in the main manuscript. Western blots correspond to those shown in Figures 2A, 4E, 4G and 5G.

Supplementary Figure 2A

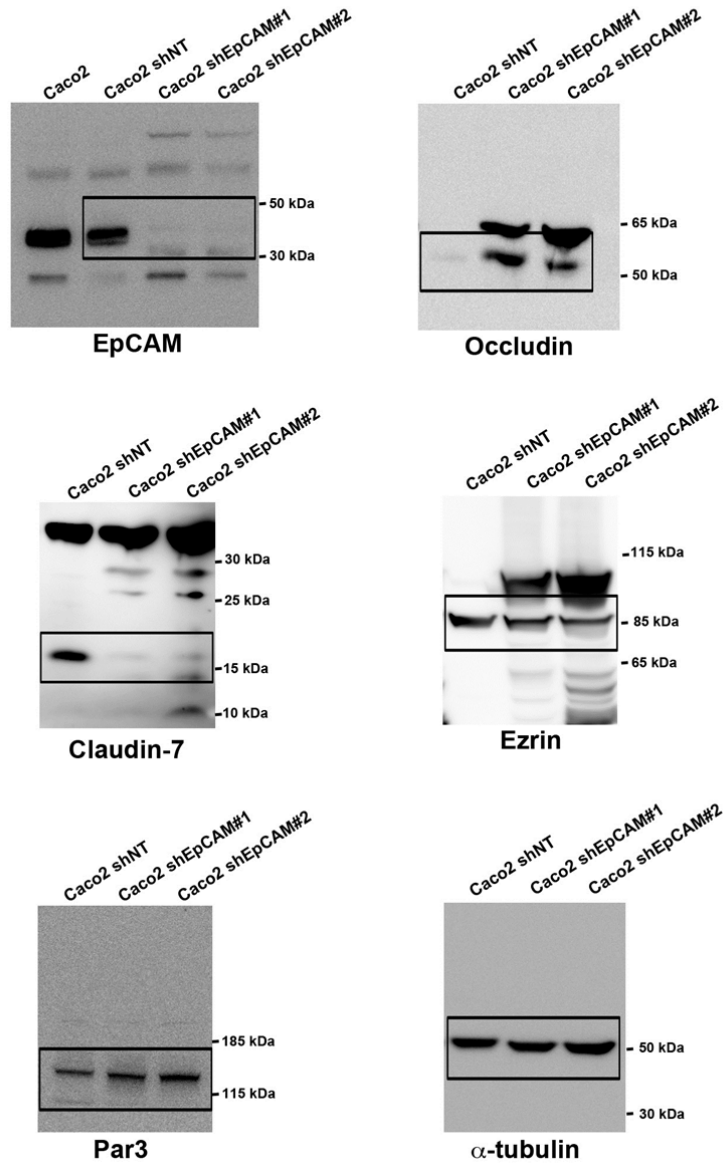

**Supplementary Figure 12:** Uncropped original gels shown in the in the Supplementary Information.

Western blots correspond to those shown in Supplementary Figure 2A.

Supplementary Figure 5A

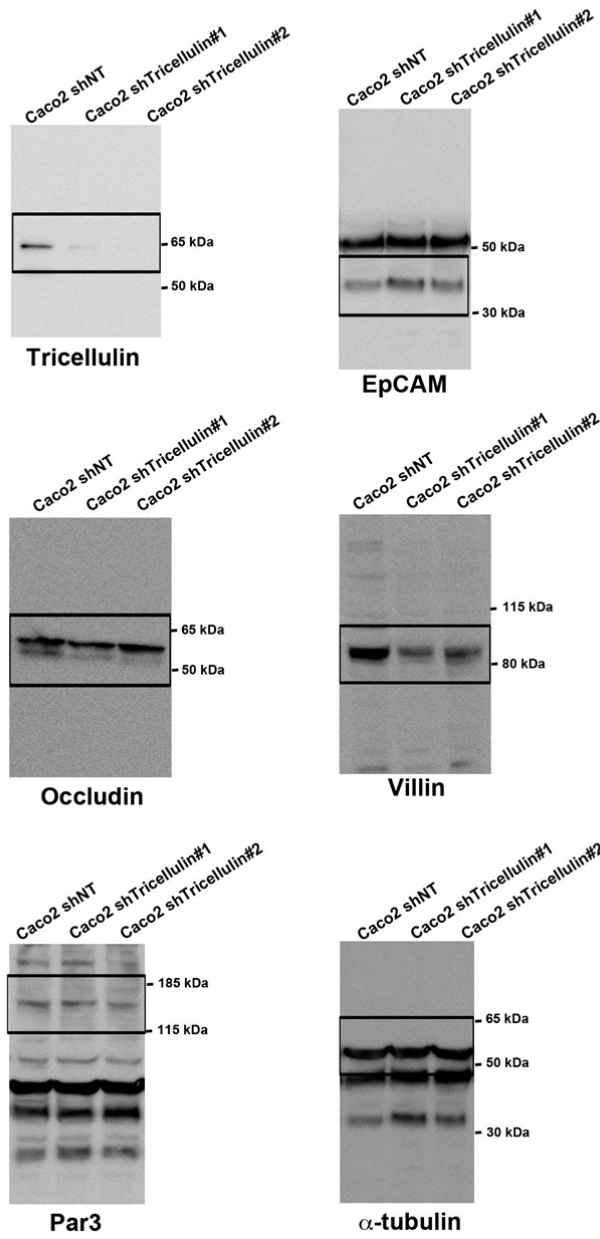

**Supplementary Figure 13:** Uncropped original gels shown in the Supplementary Information. Western blots correspond to those shown in Supplementary Figure 5A.

### Supplementary Figure 7

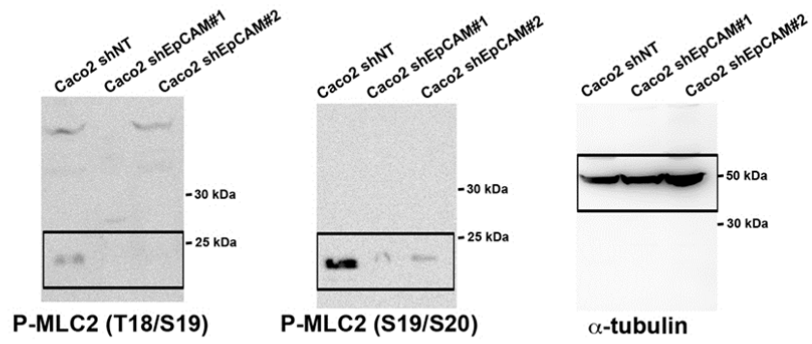

### Supplementary Figure 8

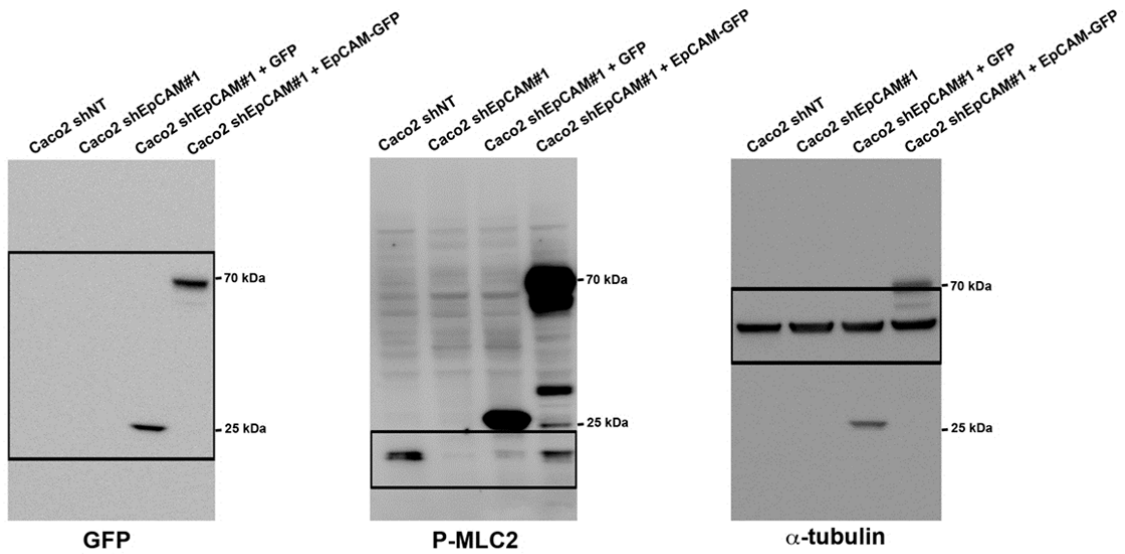

**Supplementary Figure 14:** Uncropped original gels shown in the Supplementary Information. Western blots correspond to those shown in Supplementary Figures 7 and 8.
